# Supplementary material for: Dorsal root ganglia control nociceptive input to the central nervous system
Source: PubMed Central journal article supplement (PMC9847955; doi:10.1371/journal.pbio.3001958), 2023-01-05
Supplement: pbio.3001958.s012.pdf [file pbio.3001958.s012.pdf]

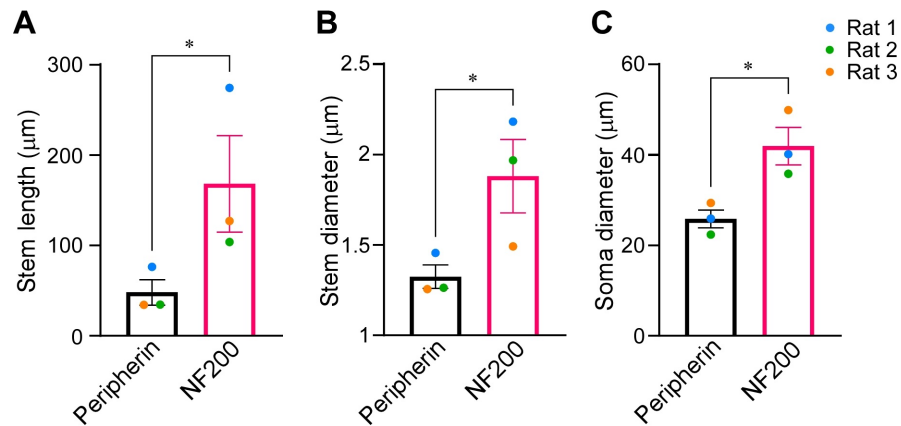

**S12 Fig. Additional analysis of initial axon morphology.** Light-sheet microscopy of cleared rat DRG; axon lengths (A), stem diameter (B) and somatic diameter (C) of the peripherin- and NF-200-labelled fibers were analyzed per animal (see also Figure 6C-E). (A) peripherin: 3 animals (rat 1: 5 DRGs, 36 stems; rat 2: 2 DRGs, 9 stems; rat 3: 3 DRGs, 12 stems). NF200: 3 animals (rat 1: 4 DRGs, 22 stems; rat 2: 1 DRG, 3 stems; rat 3: 2 DRGs, 5 stems); paired t-test:  $t(2)=3$ ,  $p<0.05$ . (B) peripherin: 3 animals (rat 1: 5 DRGs, 36 stems; rat 2: 2 DRGs, 9 stems; rat 3: 3 DRGs, 12 stems). NF200: 3 animals (rat 1: 4 DRGs, 22 stems; rat 2: 1 DRG, 3 stems; rat 3: 2 DRGs, 5 stems); paired t-test:  $t(2)=3$ ,  $p<0.05$ . (C) peripherin: 3 animals (rat 1: 5 DRGs, 150 somas; rat 2: 2 DRGs, 122 somas; rat 3: 3 DRGs, 155 somas). NF200: 3 animals (rat 1: 4 DRGs, 150 somas; rat 2: 1 DRG, 31 somas; rat 3: 2 DRGs, 75 somas); paired t-test:  $t(2)=7$ ,  $p<0.05$ . Metadata for quantifications presented in this figure can be found at <https://archive.researchdata.leeds.ac.uk/1042/>
